# Supplementary material for: l-Buthionine Sulfoximine Detection and Quantification in Polyurea Dendrimer Nanoformulations
Source: MDPI journal article supplement (doi:10.3390/molecules24173111), 2019-08-27
Supplement: s1 [file s1]

## Supporting Information

Pedro Mota,<sup>1</sup> Rita F. Pires,<sup>1</sup> Jacinta Serpa<sup>2,3</sup> and Vasco D. B. Bonifácio<sup>1</sup>

<sup>1</sup>CQFM-IN and IBB-Institute for Bioengineering and Biosciences, Instituto Superior Técnico, Universidade de Lisboa, 1049-001 Lisboa, Portugal.

<sup>2</sup>CEDOC, Chronic Diseases Research Centre, NOVA Medical School, Faculdade de Ciências Médicas, Universidade NOVA de Lisboa, Campo dos Mártires da Pátria, 130, 1169-056 Lisboa, Portugal.

<sup>3</sup>Instituto Português de Oncologia de Lisboa Francisco Gentil (IPOLFG), Rua Prof Lima Basto 1099-023 Lisboa, Portugal.

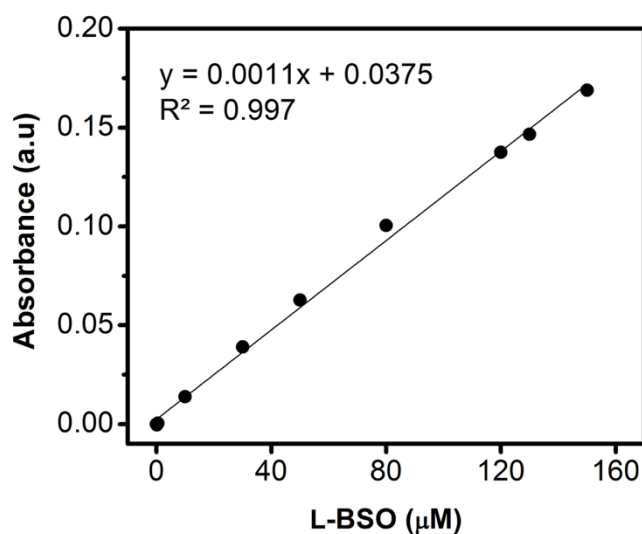

**Figure S1.** Calibration curve of L-BSO derivatization. Absorption measured at 503 nm.

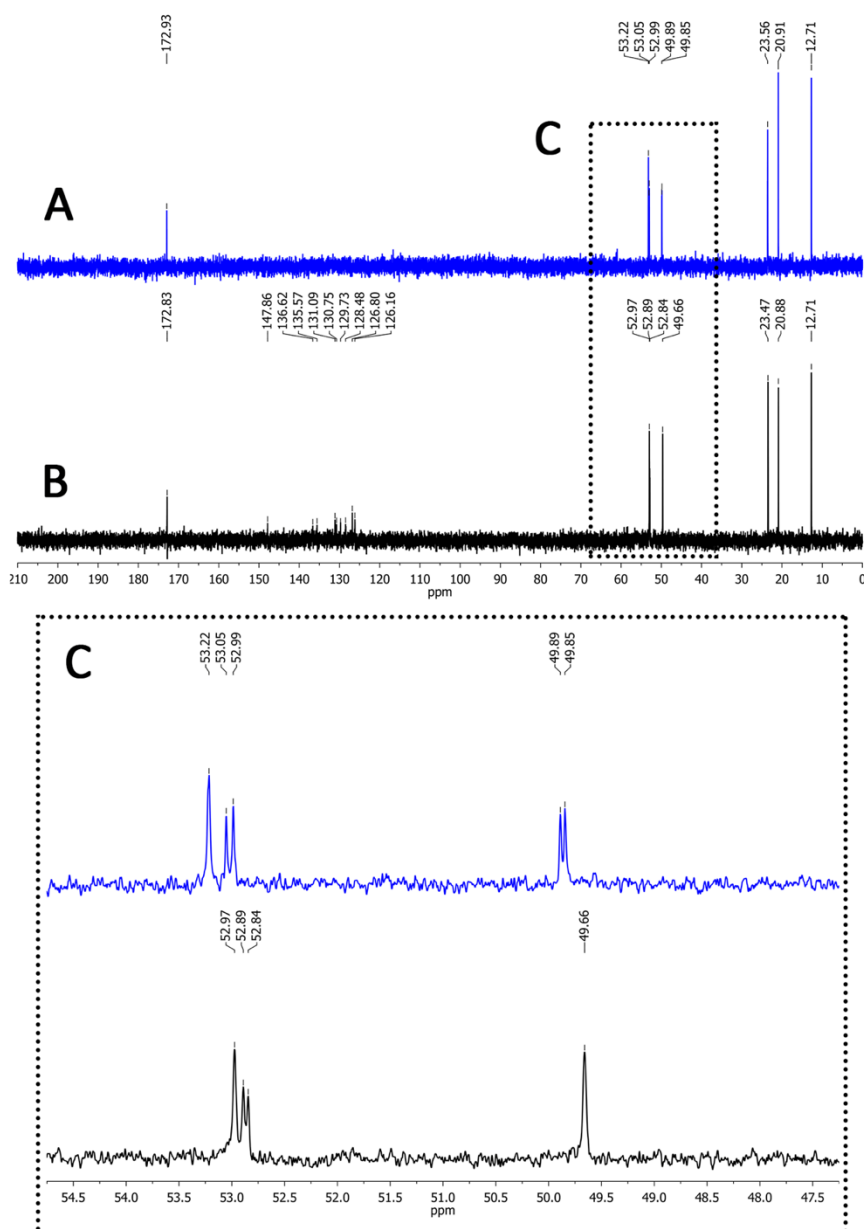

**Figure S2.**  $^{13}\text{C}$  NMR spectra of L-BSO *in situ* derivatization reaction followed by NMR. Comparative spectrum of (A) L-BSO and (B) L-BSO derivative (3). Amplification of the spectra in the region 49-45 ppm (C) is also shown.
